# Supplementary material for: Spatial Colinear but Broken Temporal Expression of Duplicated ParaHox Genes in Asexually Reproducing Annelids, Nais communis and Pristina longiseta
Source: MDPI journal article supplement (doi:10.3390/genes14071501), 2023-07-22
Supplement: s1 [file s1]

Supplementary Materials

**Table S1.** Primer sequences used to clone fragments of the *Plo*- and *Nco-Parahox* genes presented in the paper

| <b><i>Plo-Gsx</i>, <i>Plo-Xlox</i>, and <i>Plo-Cdx</i> short fragments</b>                                                                     |                |                                     |
|------------------------------------------------------------------------------------------------------------------------------------------------|----------------|-------------------------------------|
| forward                                                                                                                                        |                | 5'-GBCARYTNGTHGARYTVGARAARG-3'      |
| forward                                                                                                                                        |                | 5'-GGNAARACNMGNACNAARGAYAARTAYMG-3' |
| forward                                                                                                                                        |                | 5'-CARYTKYTDGARYTHGARMGRG-3'        |
| reverse                                                                                                                                        |                | 5'-CKNCKRTTYTGRAACCA-3'             |
| <b><i>Plo-Gsx</i>, <i>Plo-Xlox</i>, and <i>Plo-Cdx</i> RACE fragments</b>                                                                      |                |                                     |
| <i>Plo-Gsx</i> 3'RACE                                                                                                                          | forward        | 5'-GTCACITTCGGACGAACGAGTACC-3'      |
|                                                                                                                                                | forward nested | 5'-GGTGAACGCCGCGCATCGAAATG-3'       |
| <i>Plo-Gsx</i> 5'RACE                                                                                                                          | reverse        | 5'-GATTTGCTGTTGAGACAGGTTTAAAGCG-3'  |
|                                                                                                                                                | reverse nested | 5'-CCATTCGATGCGCGGCGTTCGAC-3'       |
| <i>Plo-Gsx</i> 3'RACE                                                                                                                          | forward        | 5'-GCTAGAGCTTGAGCGTCAGTTC AAC-3'    |
|                                                                                                                                                | forward nested | 5'-CCAACATGTACCTCTCGAGATTGC-3'      |
| <i>Plo-Gsx</i> 5'RACE                                                                                                                          | reverse        | 5'-GATCTGTTTTTCGAAAGCTGGAGGCAG-3'   |
|                                                                                                                                                | reverse nested | 5'-CTGCAATCTCGATCCGGCGCAATCTC-3'    |
| <i>Plo-Xlox</i> 3'RACE                                                                                                                         | forward        | 5'-GCTACTTGAGCTCGAGAAAGAAATTCAC-3'  |
|                                                                                                                                                | forward nested | 5'-CTACGACAAATATATATCCAGAGCTCGAC-3' |
| <i>Plo-Xlox</i> 5'RACE                                                                                                                         | reverse        | 5'-GTGACGCTCTGTGAGTCGAAGAACTTG-3'   |
|                                                                                                                                                | reverse nested | 5'-GGCCATTTCCAGACGTCGAGCTC-3'       |
| <i>Plo-Cdx</i> 3'RACE                                                                                                                          | forward        | 5'-CGCAGTTAGTCGAGTTCGAAAAGGAA-3'    |
|                                                                                                                                                | forward nested | 5'-CAATTCAACGTAAGGCTGAGCTGGCTGG-3'  |
| <i>Plo-Cdx</i> 5'RACE                                                                                                                          | reverse        | 5'-CGGCTGTTTGAACAGATCTTA ACTTG-3'   |
|                                                                                                                                                | reverse nested | 5'-CTGTCTGAGAGTCCGATAGTGCCAGCC-3'   |
| <i>Plo-Cdx</i> 3'RACE                                                                                                                          | forward        | 5'-CCAGCTCGTCGAGTTGGAGAAGG-3'       |
|                                                                                                                                                | forward nested | 5'-CCAGTACATCACAATACAACGCAAAGC-3'   |
| <i>Plo-Cdx</i> 3'RACE                                                                                                                          | reverse        | 5'-GGTTTTGGAACAGATCTTGACCTGACGG-3'  |
|                                                                                                                                                | reverse nested | 5'-GGTCTGATAGACCAATATGTCCAGCAAG-3'  |
| <b><i>Plo-Gsx</i>, <i>Plo-Xlox</i>, and <i>Plo-Cdx</i> fragments used as templates for RNA probes *</b>                                        |                |                                     |
| <i>Plo-Gsx1</i>                                                                                                                                | forward        | 5'-GAAGATGCCCCGACATTCGTTCTGTTG-3'   |
|                                                                                                                                                | reverse        | 5'-GTCCCGTGTATAAGTTGCGATAATGC-3'    |
| <i>Plo-Gsx2</i>                                                                                                                                | forward        | 5'-GAATTATCCAGCCGTCGACTGCCATC-3'    |
|                                                                                                                                                | reverse        | 5'-CAGTCCACGATGTTCTTGCCGACAAC-3'    |
| <i>Plo-Xlox</i>                                                                                                                                | forward        | 5'-CCGTCACTCAGAGGATTGATGGAAAAC-3'   |
|                                                                                                                                                | reverse        | 5'-GACGTTGTGAAGTGGGCGGATGTG-3'      |
| <i>Plo-Cdx1</i>                                                                                                                                | forward        | 5'-GCAATCGTTCGTTACCTGCCGCTG-3'      |
|                                                                                                                                                | reverse        | 5'-CACTCTATCGTCAGGCAATGTAACC-3'     |
| *Previously cloned 5'partial CDS fragment of <i>Plo-Cdx2</i> (1507 bp, GenBank JQ685130) was used as a template for <i>Plo-Cdx2</i> RNA probe. |                |                                     |
| <b><i>Nco-Gsx</i>, <i>Nco-Xlox</i>, and <i>Nco-Cdx</i> fragments used as templates for RNA probes</b>                                          |                |                                     |
| <i>Nco-Gsx1</i>                                                                                                                                | forward        | 5'-CAGTCATTCCTCGTCGATTCACTCC-3'     |
|                                                                                                                                                | reverse        | 5'-GGTGGTTGTTGCTGTAGCTGATGTC-3'     |
| <i>Nco-Gsx2</i>                                                                                                                                | forward        | 5'-CTGCCCTGTCGTCTCTGGTAGCAC-3'      |
|                                                                                                                                                | reverse        | 5'-GTAGTGTGGTGGACGAATCAGTTGC-3'     |
| <i>Nco-Xlox</i>                                                                                                                                | forward        | 5'-GACTGGTTACAGCAGCAGGGACG-3'       |
|                                                                                                                                                | reverse        | 5'-CAGCAACTCCATCAATCTCCGAC-3'       |
| <i>Nco-Cdx1</i>                                                                                                                                | forward        | 5'-GGTCACGGGTCAACTTATAGTCATC-3'     |

|                 |         |                                   |
|-----------------|---------|-----------------------------------|
| <i>Nco-Cdx2</i> | reverse | 5'-GAACCAAATCTTGACTTGACGCTCG-3'   |
|                 | forward | 5'-GGTACACCATATTGACGATAGCATCAG-3' |
|                 | reverse | 5'-CCGTTCCGCTTGATGATCCACTAC-3'    |

**Table S2.** GenBank accession numbers for sequences used for Gsx, Xlox, and Cdx amino acid alignments

| Phylum        | Gene name in tree | Species                                       | GenBank #      |
|---------------|-------------------|-----------------------------------------------|----------------|
| Annelida      | Cte_Antp          | (outgroup) <i>Capitella teleta</i> , Antp Hox | EU196547       |
|               | Nco-Gsx1          | <i>Nais communis</i>                          | OR050790       |
|               | Nco-Gsx2          | <i>Nais communis</i>                          | OR050791       |
|               | Plo-Gsx1          | <i>Pristina longiseta</i>                     | OR050795       |
|               | Plo-Gsx2          | <i>Pristina longiseta</i>                     | OR050796       |
|               | Avi_Gsx           | <i>Alitta virens</i>                          | ABB59695.1     |
|               | Cte_Gsx           | <i>Capitella teleta</i>                       | AAZ23124.1     |
|               | Pdu_Gsx           | <i>Platynereis dumerilii</i>                  | ACH87538.1     |
|               | Nco-Xlox          | <i>Nais communis</i>                          | OR050792       |
|               | Plo-Xlox          | <i>Pristina longiseta</i>                     | OR050797       |
|               | Cte_Xlox          | <i>Capitella teleta</i>                       | AAZ95509.1     |
|               | Hro_Xlox          | <i>Helodbella robusta</i>                     | XP_009020396.1 |
|               | Pdu_Xlox          | <i>Platynereis dumerilii</i>                  | ACH87541.1     |
|               | Nco-Cdx1          | <i>Nais communis</i>                          | OR050793       |
|               | Nco-Cdx2          | <i>Nais communis</i>                          | OR050794       |
|               | Plo-Cdx1          | <i>Pristina longiseta</i>                     | OR050798       |
|               | Plo-Cdx2          | <i>Pristina longiseta</i>                     | OR050799       |
|               | Avi_Cdx           | <i>Alitta virens</i>                          | AAN11403.2     |
|               | Cte_Cdx           | <i>Capitella teleta</i>                       | AAZ95508.1     |
|               | Pdu_Cdx           | <i>Platynereis dumerilii</i>                  | ACH87546.1     |
|               | Pex_Gsx           | <i>Perionyx excavatus</i>                     | AAX09760.1     |
| Mollusca      | Aca_Gsx           | <i>Aplysia californica</i>                    | XP_005093203.2 |
|               | Aen_Gsx           | <i>Antalis entalis</i>                        | ALM30865.1     |
|               | Sof_Gsx           | <i>Sepia officinalis</i>                      | ALC76021.1     |
|               | Ema_Xlox          | <i>Elysia marginata</i>                       | GFR99919.1     |
|               | Pma_Xlox          | <i>Pecten maximus</i>                         | XP_033742737.1 |
|               | Sof_Xlox          | <i>Sepia officinalis</i>                      | AHY00652.1     |
|               | Pvu_Cdx           | <i>Patella vulgata</i>                        | CAD57266.1     |
| Insecta       | Tca_Gsx           | <i>Tribolium castaneum</i>                    | NP_001034494.1 |
|               | Tca_Cdx           | <i>Tribolium castaneum</i>                    | XP_008191732.1 |
| Echinodermata | Spu_Gsx           | <i>Strongylocentrotus purpuratus</i>          | XP_784486.3    |
|               | Spu_Xlox          | <i>Strongylocentrotus purpuratus</i>          | XP_003728715.2 |
|               | Spu_Cdx           | <i>Strongylocentrotus purpuratus</i>          | XP_789158.3    |
| Hemichordata  | Sko_Gsx           | <i>Saccoglossus kowalevskii</i>               | XP_002732050.2 |
|               | Sko_Xlox          | <i>Saccoglossus kowalevskii</i>               | XM_002741106.1 |
|               | Sko_Cdx           | <i>Saccoglossus kowalevskii</i>               | NP_001158415.1 |
| Chordata      | Mmu_Gsx1          | <i>Mus musculus</i>                           | NP_032204.1    |
|               | Xla_Gsx1          | <i>Xenopus laevis</i>                         | XP_018103198.1 |
|               | Mmu_Gsx2          | <i>Mus musculus</i>                           | NP_573555.1    |
|               | Xla_Gsx2          | <i>Xenopus laevis</i>                         | XP_018098177.1 |
|               | Bfl_Xlox          | <i>Branchiostoma floridae</i>                 | XP_035682017.1 |
|               | Mmu_Xlox          | <i>Mus musculus</i>                           | NP_032840.1    |
|               | Xla_Xlox          | <i>Xenopus laevis</i>                         | XP_018103197.1 |
|               | Bfl_Cdx           | <i>Branchiostoma floridae</i>                 | XP_035680992.1 |

|          |             |                               |                |
|----------|-------------|-------------------------------|----------------|
|          | Mmu_Cdx1    | <i>Mus musculus</i>           | AAA37412.1     |
|          | Mmu_Cdx2    | <i>Mus musculus</i>           | NP_031699.2    |
|          | Mmu_Cdx4    | <i>Mus musculus</i>           | NP_031700.1    |
|          | Xla_Cdx1    | <i>Xenopus laevis</i>         | XP_018105758.1 |
|          | Xla_Cdx2    | <i>Xenopus laevis</i>         | AAI46638.1     |
|          | Xla_Cdx4    | <i>Xenopus laevis</i>         | AAH55999.2     |
| Cnidaria | Nvi_Gsx     | <i>Nematostella vectensis</i> | AAD39349.1     |
|          | Nvi_ParaHox | <i>Nematostella vectensis</i> | ACT36590.1     |

**Figure S1.** CLUSTAL W 2.0 multiple alignment of ParaHox sequences used for phylogenetic analysis (Figure 1)

```

Cte_Antp      QFGPERKGRQTYTRYQTLELEKEFEHFNRYLTRRRRIEIAHALCLTERQIKIWFQNRRMKWKKE
Nvi_ParaHox   SSAQVRSRARTAYTASQQLELEKEFLYSRYITRTRRKELANTLDLSEKHIKIWFQNRRMKKKKTD
Cte_Gsx       ESSDAVKRMRTAFSSTQLELEREFASNMYLSRLRRIE IATYLSLSEKQVKIWFQNRRVKFKKE
Pdu_Gsx       MEDANGKRIRTAFTSTQLELEREFSNMYLSRLRRIE IATYLNSEKQVKIWFQNRRVKYKKE
Avi_Gsx       IEDANGKRIRTAFTSTQLELEREFSNMYLSRLRRIE IATYLNSEKQVKIWFQNRRVKYKKE
Sko_Gsx       NLXTSCKRIRTAFTSTQLELEREFASNMYLSRLRRIE IATYLNSEKQVKIWFQNRRVHKHKE
Spu_Gsx       QIRESSKRIRTAFTSTQLELEREFASNMYLSRLRRIE IATYLNSEKQVKIWFQNRRVKYKKE
Nvi_Gsx       XXXSRSKRIRTAFTSMQLELEKEFSQNYLSRLRRIQIAALLDLSEKQVKIWFQNRRVKWKDK
Tca_Gsx       XXXASSKRIXTAFTSTQLELEREFASNMYLSRLRRIE IATCLRLSEKQVKIWFQNRRVKYKKE
Aca_Gsx       DLXPSSKRMRTAFSTQLELEREFAGTNMYLSRLRRIE IATCLNLSEKQVKIWFQNRRVHKHKE
Xla_Gsx1      QLXPSSKRMRTAFSTQLELEREFASNMYLSRLRRIE IATYLNSEKQVKIWFQNRRVHKHKE
Aen_Gsx       DLXISSKRIRTAFTSTQLLDLEREFNSNMYLSRLRRIE IATYLNSEKQVKIWFQNRRVKYKKE
Sof_Gsx       XXXQSSKRIRTAFTSTQLELEREFASNMYLSRLRRIE IATYLNSEKQVKIWFQNRRVKYKKE
Mmu_Gsx1      QLXPSSKRMRTAFSTQLELEREFASNMYLSRLRRIE IATYLNSEKQVKIWFQNRRVHKHKE
Xla_Gsx2      QAXQNGKRMRTAFSSTQLELEKEFEHFNKYISRPRIELASMLSLTERHIKIWFQNRRMKWKKE
Mmu_Gsx2      QVXPNGKRMRTAFSTQLELEREFSNMYLSRLRRIE IATYLNSEKQVKIWFQNRRVHKHKE
Pex_Gsx       XXXXXSKRIRTAFTDSRQLDLEREFAGNMYLSRLRRIE IANSLSLTEKQVKIWFQNSRXXXXXX
Nco_Gsx1      SHAATKRRMRTAFSTRQLELEKEFGANMYLSRLRRIE IAACLQLSEKQIKIWFQNRRVKYKKE
Nco_Gsx2      DKPPGGKRARTSFTSEQLIELERHFNSNEYLGRTPRVEMALALNLSEKQIKIWFQNRRMKQKKE
Plo_Gsx1      HHHVTRRRMRTAFSTRQLELEKEFGANMYLSRLRRIE IAACLQLSEKQIKIWFQNRRVKYKKE
Plo_Gsx2      TDGAAAKRRRTIFSSEQLIELERHFRTNEYLGRTPRIEMALALNLSEKQIKIWFQNRRMKQKKE
Pdu_Xlox      DFTDENKRTRTAYTRSQLELEKEFEHFNKYISRPRIELASMLSLTERHIKIWFQNRRMKWKKE
Bfl_Xlox      AVEDENKRTRTAYTRGQLELEKEFEHFNKYISRPRIELAAMLNLTERHIKIWFQNRRMKWKKE
Sko_Xlox      QDLDENKRTRTAYTRSQLELEKEFEHFNKYISRPRIELAAMLNLTERHIKIWFQNRRMKYKKE
Spu_Xlox      ADFDENKRTRTAYTRGQLELEKEFEHFNKYISRPRIELAAMLNLTERHIKIWFQNRRMKWKKE
Pma_Xlox      PIEDDENKRTRTAYTRGQLELEKEFEHFNKYISRPRIELAAMLNLTERHIKIWFQNRRMKWKKE
Xla_Xlox      MEQEENKRTRTAYTRAQLELEKEFEHFNKYISRPRIELAVMLNLTERHIKIWFQNRRMKWKKE
Mmu_Xlox      AEPEENKRTRTAYTRAQLELEKEFEHFNKYISRPRIELAVMLNLTERHIKIWFQNRRMKWKKE
Cte_Xlox      QTFSENKRTRTAYTRAQLELEKEFEHFNRYITRPRRVELAAHLNLTEQHIIKIWFQNRRMKWKDV
Hro_Xlox      HILDDNKRTRTAYSRQLELEKEFEHFDKYISRPRIELASSLNLTERHIKIWFQNRRMKWKKE
Nco_Xlox      RMFDENKRTRTAYTRAQLELEKEFEHFDKYISRRLELANLLRLTERHIKIWFQNRRMKWKKE
Plo_Xlox      RTFDENKRTRTAYTRAQLELEKEFEHFDKYISRRLEMAKVLRRLTERHIKIWFQNRRMKWKKE
Cte_Cdx       GKTRTKDKYRIVYSEYQKVELEKEYLSKYITIQRKAELSRISGLSERQVKIWFQNRRAKERKQK
Pdu_Cdx       XKTRTKDKYRVVYTDHQRLLEKEFEHYSRYITIRKAE LAQTLNLSEKQVKIWFQNRRAKERKQN
Avi_Cdx       XKTRTKDKYRVVYTDHQRLLEKEFEHYSRYITIRKAE LAQNLNLSEKQVKIWFQNRRAKERKQN
Bfl_Cdx       GKTRTKDKYRVVYSDHQRLLEKEFEHYSRYITIRKAE LAQNLNLSEKQVKIWFQNRRAKERKQN
Sko_Cdx       GKTRTKDKYRVVYTDHQRLLEKEFEHYSRYITIRKAE LAHALGLSERQVKIWFQNRRAKERKQN
Spu_Cdx       GKTRTKDKYRVVYTDHQRLLEKEFEHYSRYITIRKAE LAHALGLSERQVKIWFQNRRAKERKMA
Nco_Cdx1      GKTRTRDKYRTVYTEPQVELEAEFQRTTYISAQRKADIASMVGLSERQVKIWFQNRRAKERDHRD
Nco_Cdx2      GKTRTKDKYRIVYTELQKVELEKEFLNQYITIQRKAELAGTIGLSRQVKIWFQNRRAKERKHK
Plo_Cdx2      GKTRTKDKYRIVYTELQKVELEKEFLNQYITIQRKAELAGHIGLSRQVKIWFQNRRAKERKHK
Plo_Cdx1      GKTRTKDKYRTVYTDKQRLLEAEYIRATYVSMNRKLNLSCTTGLSERQVKIWFQNRRAKERDHRQ
Pvu_Cdx       GKTRTKDKYRVAYTDHQRLLEKEFEHYSRYITIRKAE IAAQLALSERQVKIWFQNRRAKERKQN
Tca_Cdx       GKTRTKDKYRVVYTDHQRLLEKEFEHYSRYITIRKAE LANSLGLSERQVKIWFQNRRAKERKQV
Mmu_Cdx1      GKTRTKDKSRVVYTDHQRLLEKEFEHYSRYITIRKAE LANLGLSERQVKIWFQNRRAKERKVN
Mmu_Cdx2      VKTRTKDKYRVVYTDHQRLLEKEFEHYSRYITIRKAE LAATLGLSERQVKIWFQNRRAKERKIK
Mmu_Cdx4      GKTRTKDKYRVVYTDHQRLLEKEFEHFNRYITIRKAE LAVNLGLSERQVKIWFQNRRAKERKMI
Xla_Cdx1      TKTRTKDKYRVVYTDQRLLEKEFEHYSRYITIRKAE LAVNLGLSERQVKIWFQNRRAKERKIN
Xla_Cdx2      SKTRTKDKYRVVYTDQRLLEKEFEHYSRYITIRKAE LAVGLGLSERQVKIWFQNRRAKERKIN
Xla_Cdx4      GKTRTKDKYRVVYTDHQRLLEKEFEHYSRYITIRKAE LANLRLSERQVKIWFQNRRAKERKLF
:           :           * : : * :           * :           : : :           * : : : : : : : : :

```
